# Supplementary material for: Unusual {⋯HNC2O⋯HCnO}, n = 1 or 2, synthons predominate in the molecular packing of one-dimensional coordination polymers, {Cd[S2P(OR)2]2(3LH2)}n, for R = Me and Et, but are precluded when R = i-Pr; 3LH2 = N,N′-bis(3-pyridylmethyl)oxalamide
Source: Royal Society of Chemistry journal article supplement (doi:10.1039/d2ce00208f), 2022-01-01
Supplement: d2ce00208f1.pdf [file d2ce00208f1.pdf]

**Unusual  $\{\cdots\text{HNC}_2\text{O}\cdots\text{HC}_n\text{O}\}$ ,  $n = 1$  or  $2$ , synthons predominate in the molecular packing of the one-dimensional coordination polymers,  $\{\text{Cd}[\text{S}_2\text{P}(\text{OR})_2]_2(^3\text{LH}_2)\}_n$ , for  $R = \text{Me}$  and  $\text{Et}$ , but are precluded when  $R = i\text{-Pr}$ ;  $^3\text{LH}_2 = N,N'$ -bis(3-pyridylmethyl)oxalamide†**

Yee Seng Tan,<sup>a</sup> Chien Ing Yeo,<sup>a</sup> Huey Chong Kwong<sup>a</sup> and Edward R. T. Tiekink<sup>a,\*</sup>

Research Centre for Crystalline Materials, School of Medical and Life Sciences, Sunway University, 47500 Bandar Sunway, Selangor Darul Ehsan, Malaysia

E-mail: [edwardt@sunway.edu.my](mailto:edwardt@sunway.edu.my) (ERTT)

ORCID ID: 0000-0002-0144-3298 (YST); 0000-0002-3224-3782 (CIY); 0000-0001-5130-8011 (HCK); 0000-0003-1401-1520 (ERTT)

## ELECTRONIC SUPPLEMENTARY INFORMATION

**ESI Figure 1.** Measured (blue trace) and simulated (red trace) PXRD patterns for (a) **1** (b) **2** and (c) **3**.

**ESI Figure 2.** FT-IR spectra for (a) **1**, (b) **2** and (c) **3**.

**ESI Figure 3.** NMR spectra measured in DMSO- $d_6$  for **1**: (a)  $^1\text{H}$ , (b)  $^{13}\text{C}\{^1\text{H}\}$  and (c)  $^{31}\text{P}\{^1\text{H}\}$ .

**ESI Figure 4.** NMR spectra measured in DMSO- $d_6$  for **2**: (a)  $^1\text{H}$ , (b)  $^{13}\text{C}\{^1\text{H}\}$  and (c)  $^{31}\text{P}\{^1\text{H}\}$ .

**ESI Figure 5.** NMR spectra measured in DMSO- $d_6$  for **3**: (a)  $^1\text{H}$ , (b)  $^{13}\text{C}\{^1\text{H}\}$  and (c)  $^{31}\text{P}\{^1\text{H}\}$ .

**ESI Figure 6.** Solid-state  $^{13}\text{C}$  CP MAS spectra of (a) **1**, (b) **2** and (c) **3** measured at 25 °C. “\*” denotes spinning side-bands.

**ESI Figure 7.** Views of the  $d_{\text{norm}}$ -Hirshfeld surfaces for (a) **1**, (b) **2** and (c) **3** (two independent molecules), highlighting the brightest red spots owing to the covalent bonds between each repeat unit.

**ESI Figure 8.** Views of the  $d_{\text{norm}}$ -Hirshfeld surfaces for **3**, highlighting the weak intermolecular contacts between the Cd1- and Cd2-containing repeat units (a) C $\cdots$ S and H $\cdots$ H contacts and (b) C–H $\cdots$ O contacts.

**ESI Figure 9.** Overall two-dimensional fingerprint plots for **1**, **2**, **3\_Cd1** and **3\_Cd2**, and those delineated into H $\cdots$ H, H $\cdots$ S/S $\cdots$ H, H $\cdots$ O/O $\cdots$ H and H $\cdots$ C/C $\cdots$ H.

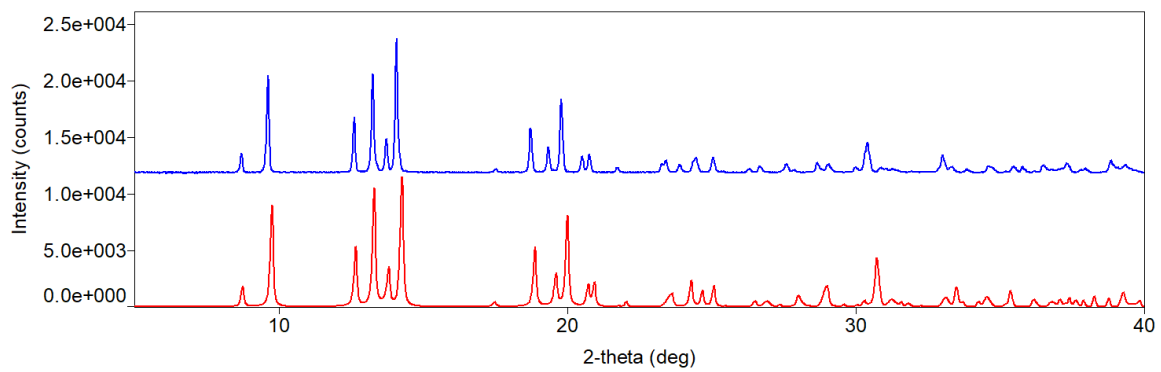

(a)

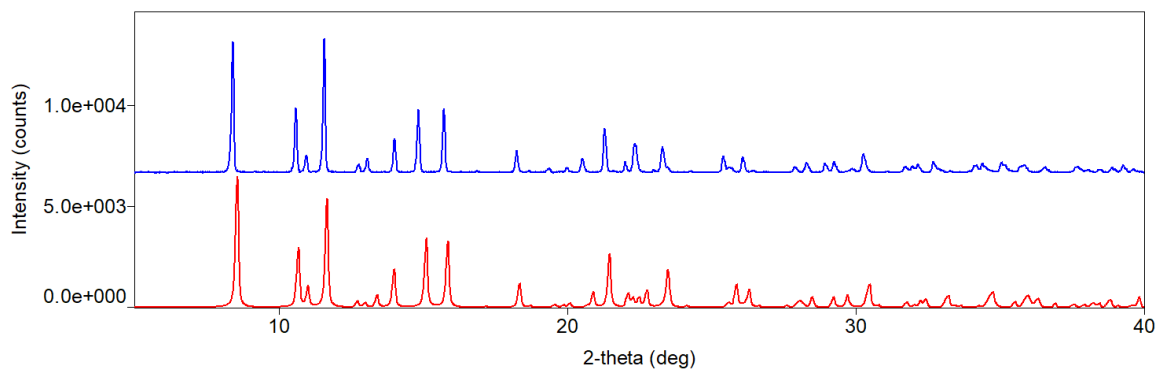

(b)

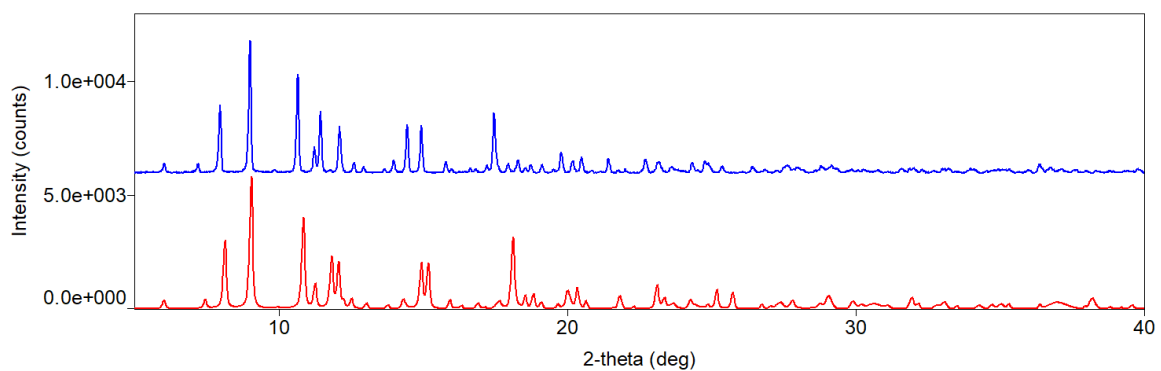

(c)

**ESI Figure 1.** Measured (blue trace) and simulated (red trace) PXRD patterns for (a) **1** (b) **2** and (c) **3**.

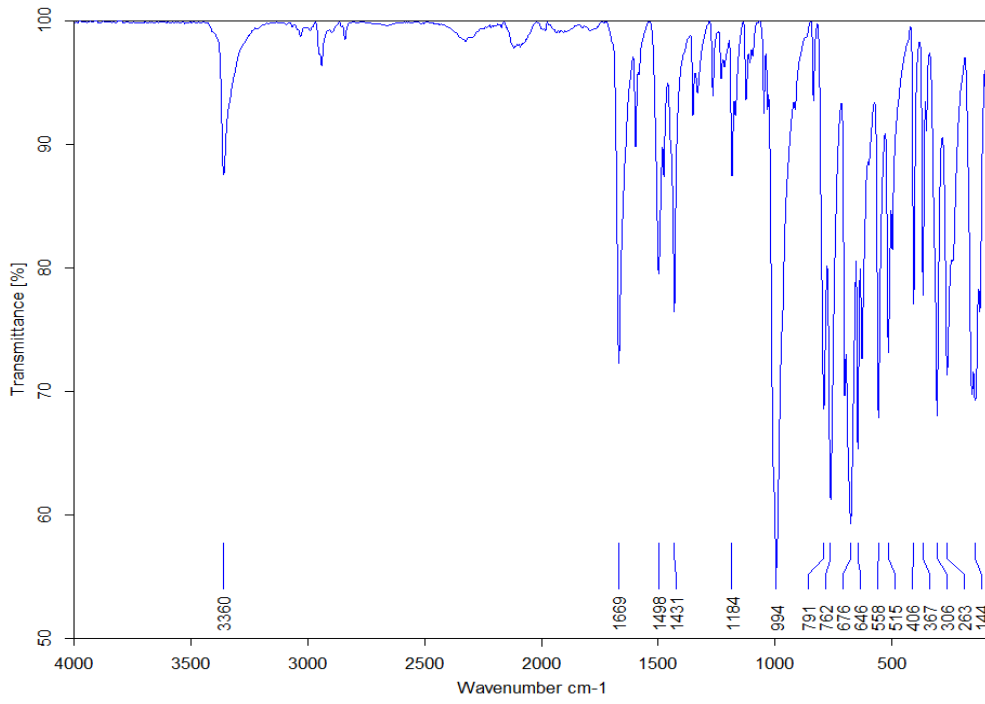

(a)

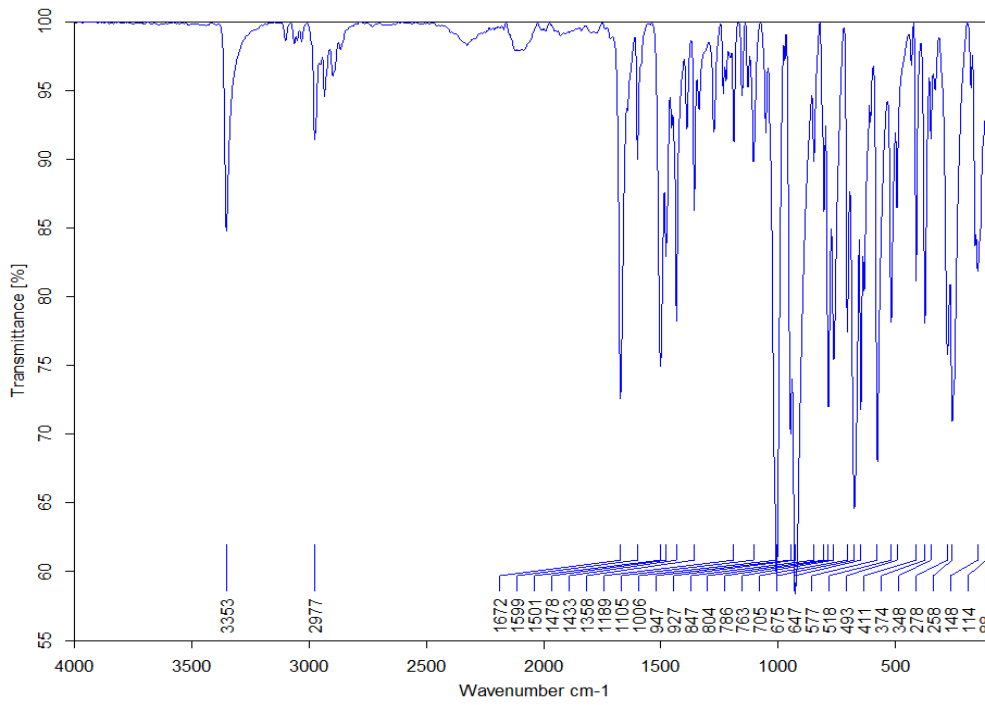

(b)

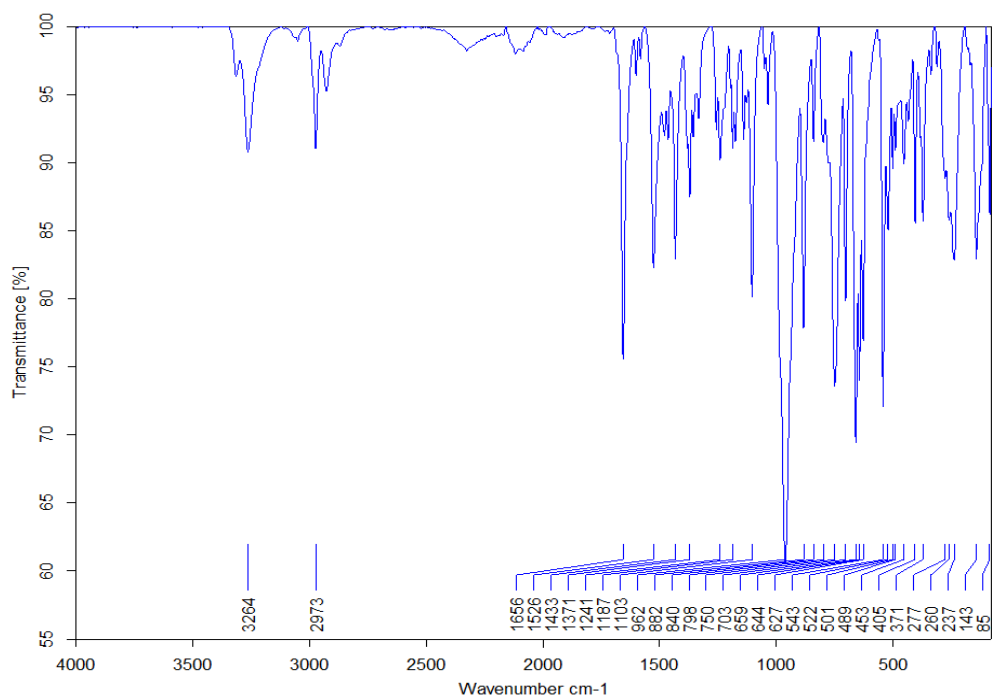

(c)

**ESI Figure 2.** FT-IR spectra for (a) **1**, (b) **2** and (c) **3**.

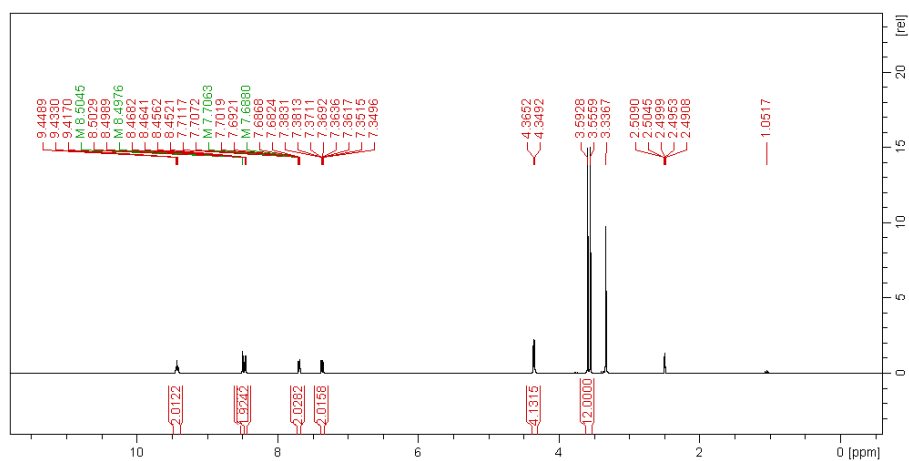

(a)

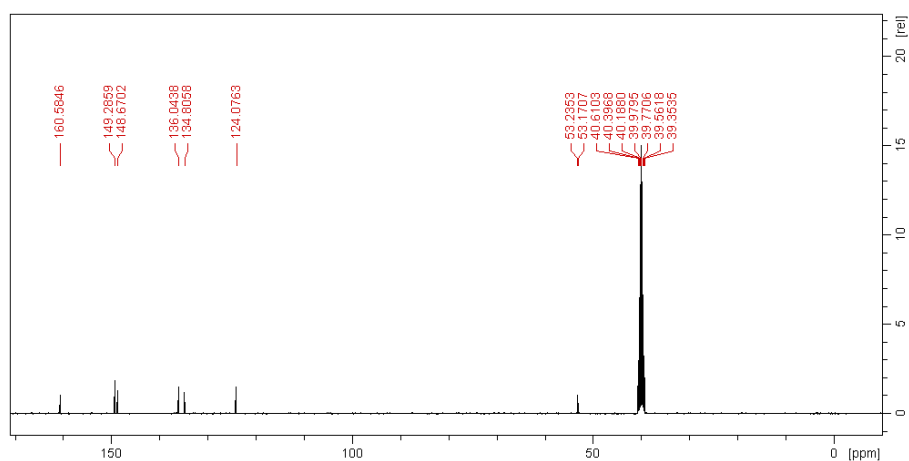

(b)

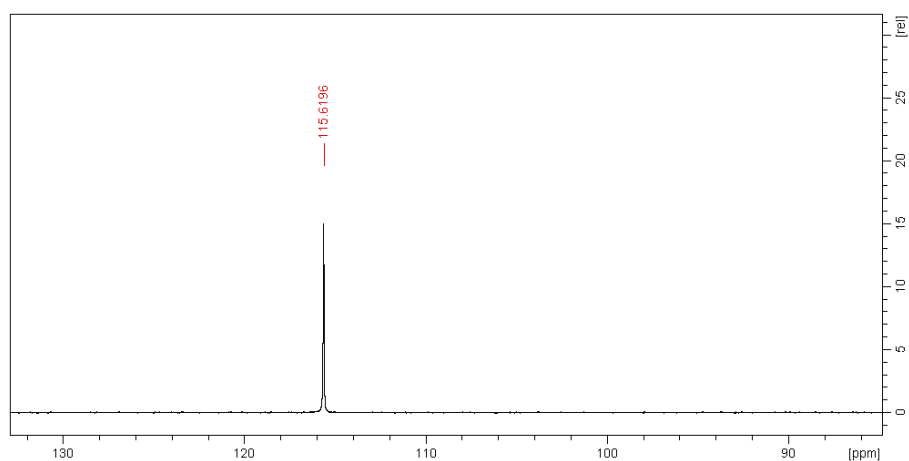

(c)

**ESI Figure 3.** NMR spectra measured in DMSO- $d_6$  for **1**: (a)  $^1\text{H}$ , (b)  $^{13}\text{C}\{^1\text{H}\}$  and (c)  $^{31}\text{P}\{^1\text{H}\}$ .

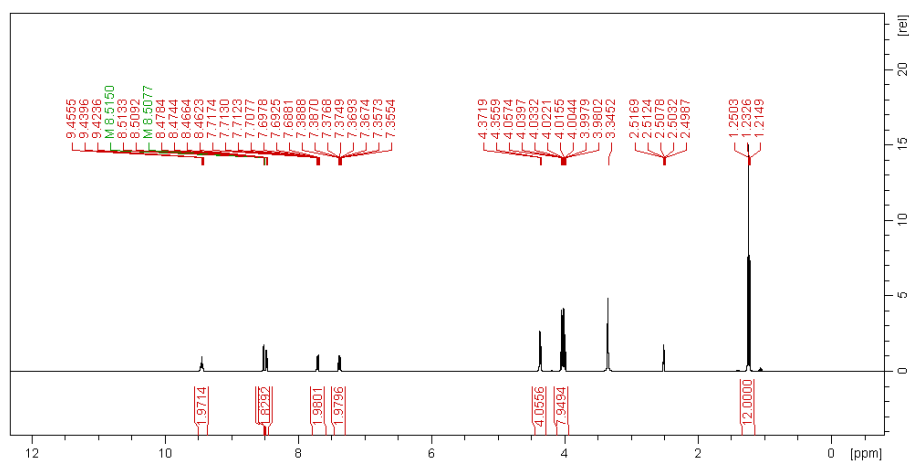

(a)

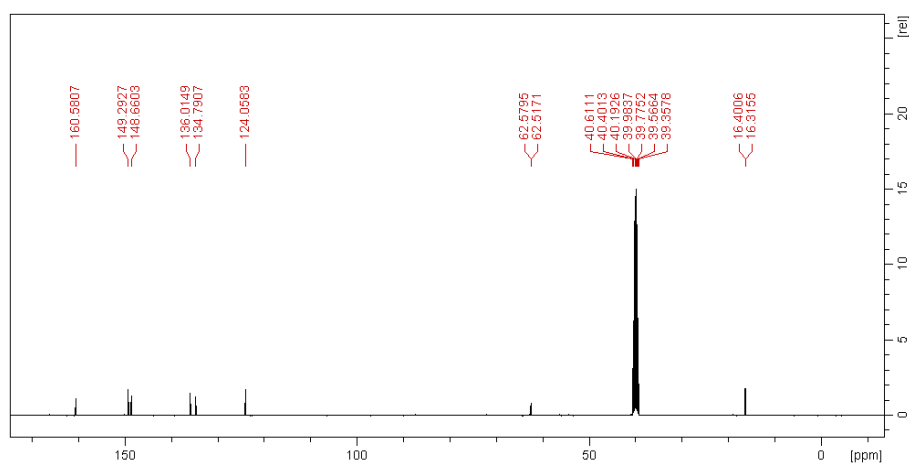

(b)

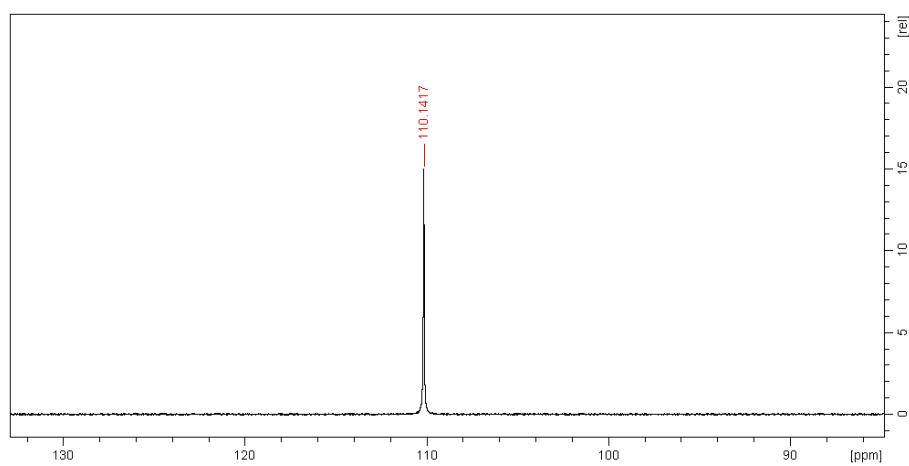

(c)

**ESI Figure 4.** NMR spectra measured in DMSO- $d_6$  for **2**: (a)  $^1\text{H}$ , (b)  $^{13}\text{C}\{^1\text{H}\}$  and (c)  $^{31}\text{P}\{^1\text{H}\}$ .

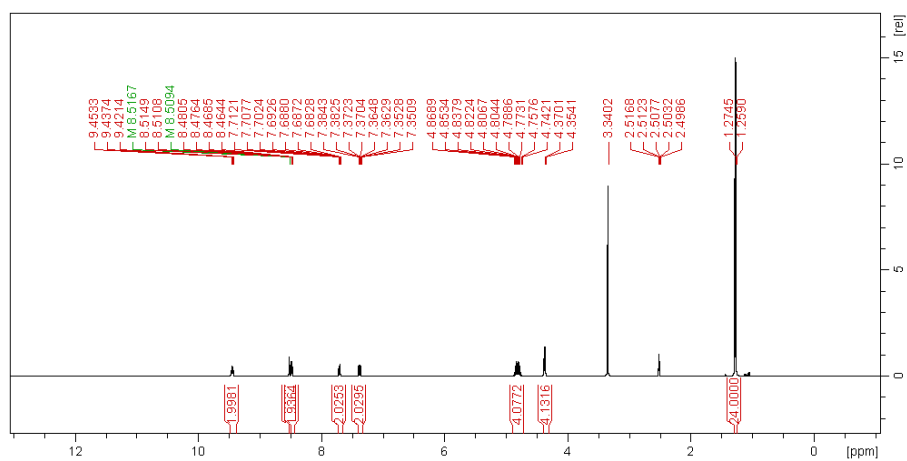

(a)

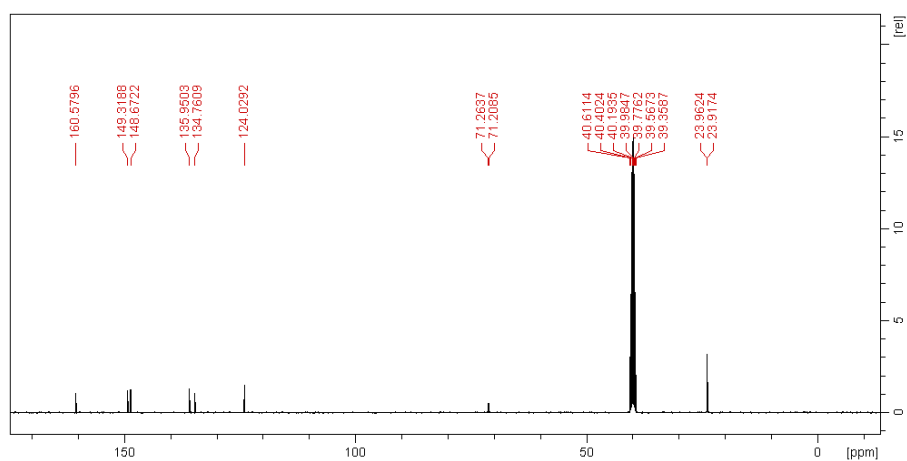

(b)

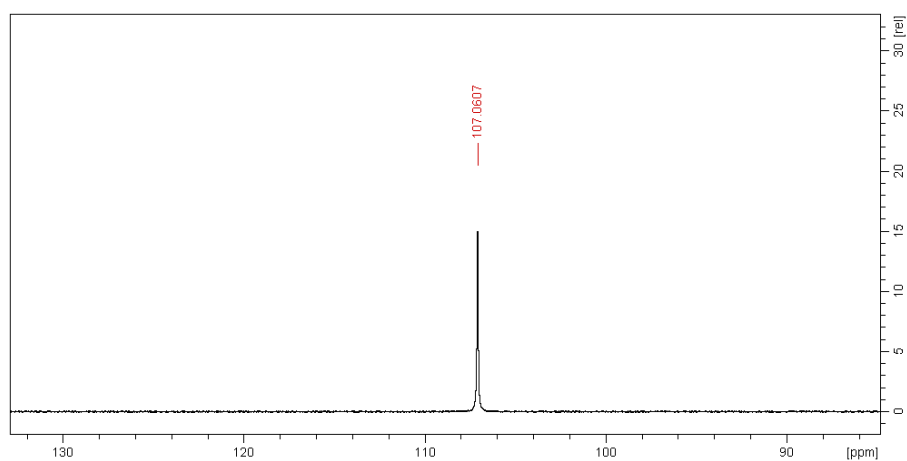

(c)

**ESI Figure 5.** NMR spectra measured in DMSO- $d_6$  for **3**: (a)  $^1\text{H}$ , (b)  $^{13}\text{C}\{^1\text{H}\}$  and (c)  $^{31}\text{P}\{^1\text{H}\}$ .



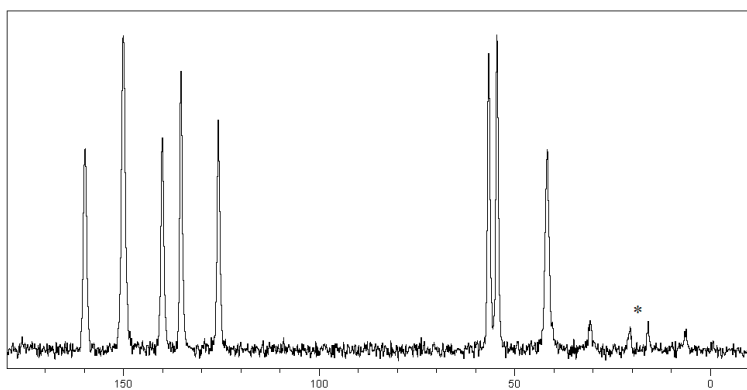

(a)

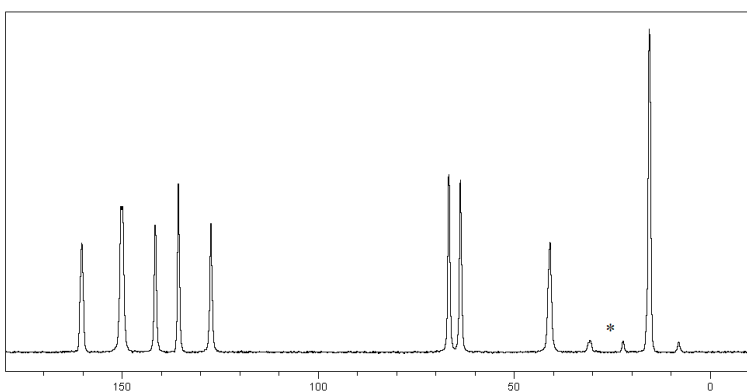

(b)

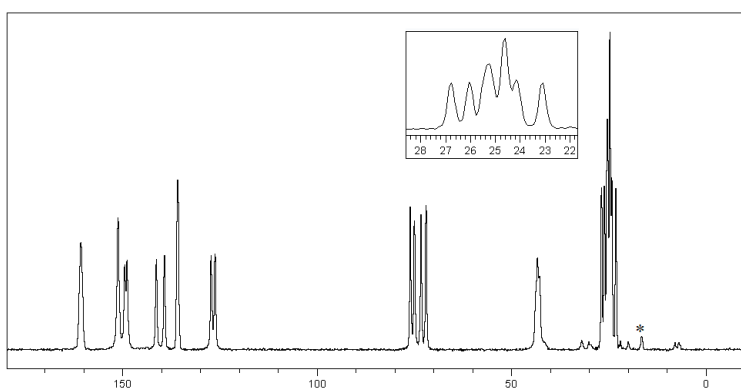

(c)

**ESI Figure 6.** Solid-state  $^{13}\text{C}$  CP MAS spectra of (a) **1**, (b) **2** and (c) **3** measured at 25 °C. “\*” denotes spinning side-bands. The insert shows the expanded region for the methyl-C nuclei.

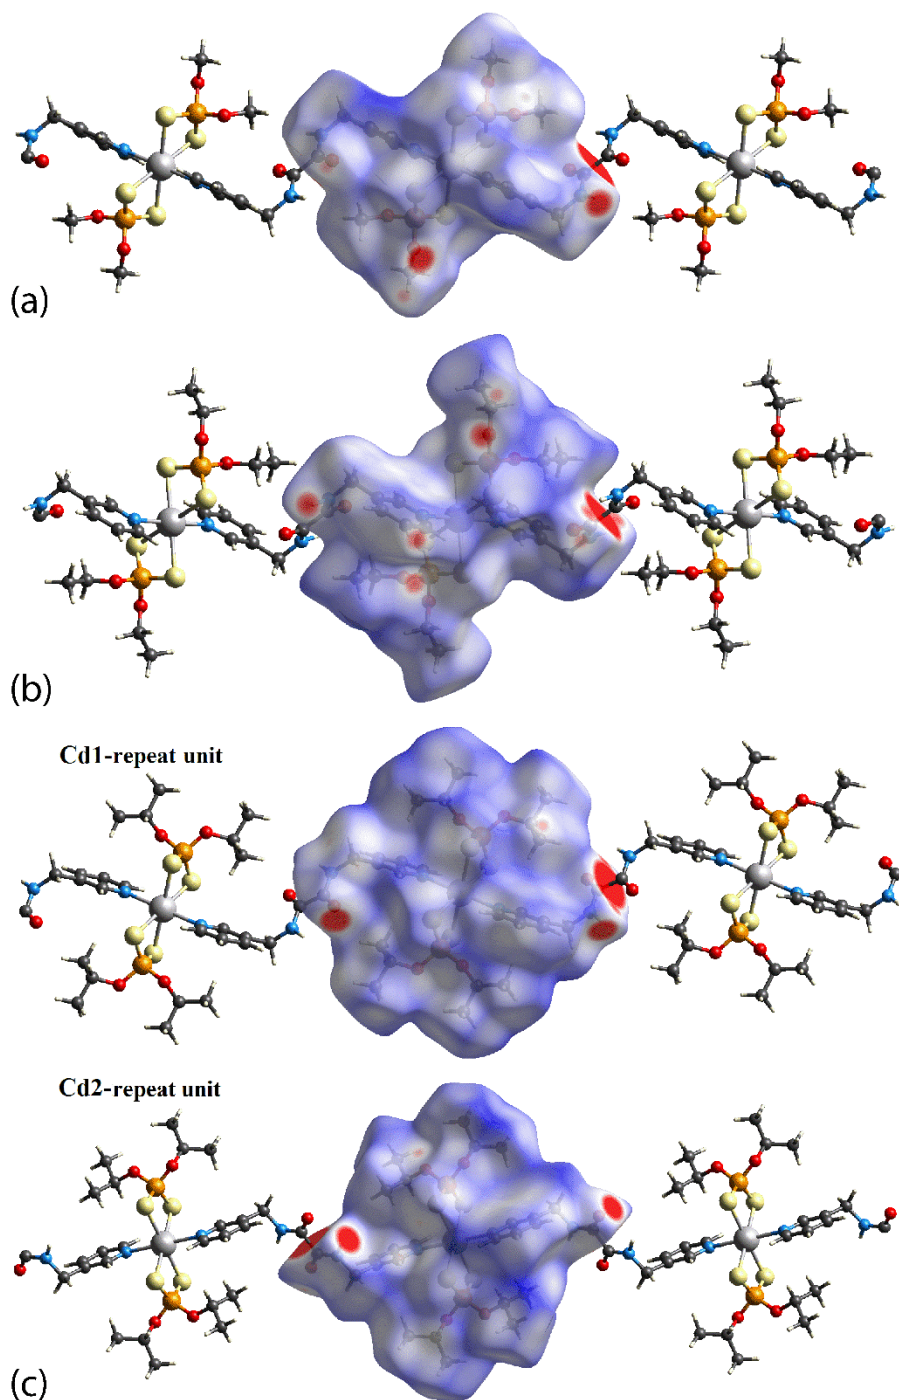

**ESI Figure 7.** Views of the  $d_{\text{norm}}$ -Hirshfeld surfaces for (a) **1**, (b) **2** and (c) **3** (two independent molecules) highlighting the brightest red spots owing to the covalent bonds between each repeat unit.

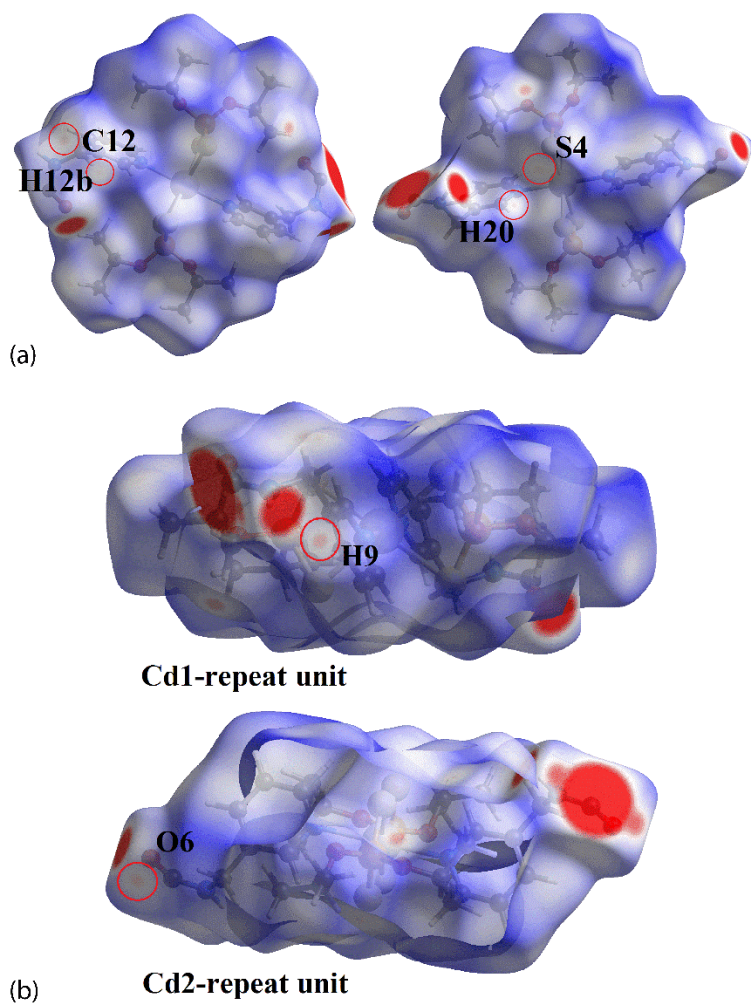

**ESI Figure 8.** Views of the  $d_{\text{norm}}$ -Hirshfeld surfaces for **3**, highlighting the weak intermolecular contacts between the Cd1- and Cd2-containing repeat units (a) C $\cdots$ S and H $\cdots$ H contacts and (b) C–H $\cdots$ O contacts.

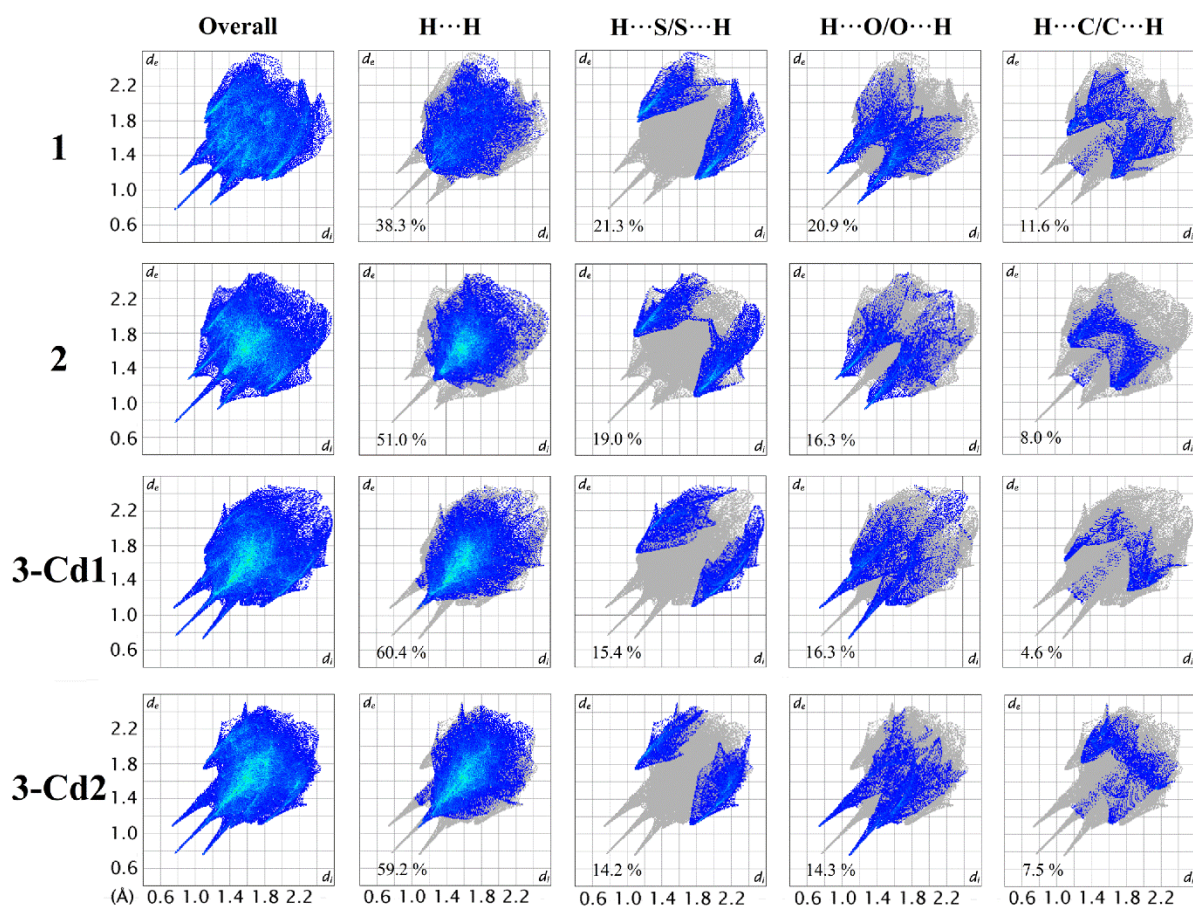

**ESI Figure 9.** Overall two-dimensional fingerprint plots for **1**, **2**, **3\_Cd1** and **3\_Cd2**, and those delineated into H...H, H...S/S...H, H...O/O...H and H...C/C...H.
